# Supplementary material for: The origin of anomalous hydrogen occupation in high entropy alloys
Source: Royal Society of Chemistry journal article supplement (doi:10.1039/d1ta10649j), 2022-01-01
Supplement: d1ta10649j1.pdf [file d1ta10649j1.pdf]

**Supplementary Materials**  
**for**  
**The Origin of Anomalous Hydrogen Occupation in High**  
**Entropy Alloys**

Jutao Hu<sup>1</sup>, Jinjing Zhang<sup>1</sup>, Menglu Li<sup>1</sup>, Sa Zhang<sup>1</sup>, Haiyan Xiao<sup>1\*</sup>, Lei Xie<sup>2</sup>, Guangai Sun<sup>2</sup>, Huahai Shen<sup>2\*\*</sup>, Xiaosong Zhou<sup>2</sup>, Xiaoqing Li<sup>3\*\*\*</sup>, Pengcheng Li<sup>1</sup>, Jianwei Zhang<sup>1</sup>, Levente Vitos<sup>3</sup>, Xiaotao Zu<sup>1</sup>

*<sup>1</sup>School of Physics, University of Electronic Science and Technology of China,  
Chengdu, 611731, China*

*<sup>2</sup>Institute of Nuclear Physics and Chemistry, China Academy of Engineering Physics,  
Mianyang, 621900, China*

*<sup>3</sup>Department of Materials Science and Engineering, KTH-Royal Institute of  
Technology, Stockholm, SE-10044, Sweden*

---

\* Corresponding author. E-mail address: [hyxiao@uestc.edu.cn](mailto:hyxiao@uestc.edu.cn)

\*\* Corresponding author. E-mail address: [huahaishen@caep.cn](mailto:huahaishen@caep.cn)

\*\*\* Corresponding author. E-mail address: [xiaoqli@kth.se](mailto:xiaoqli@kth.se)

**Supplementary Table S1.** Elastic constants ( $C_{11}$ ,  $C_{12}$ ,  $C_{13}$ ,  $C_{22}$ ,  $C_{23}$ ,  $C_{33}$ ,  $C_{44}$ ,  $C_{55}$  and  $C_{66}$  in GPa) for  $Ti_{25}V_{25}Nb_{25}Zr_xTa_{25-x}$  ( $Zr_x$ ,  $x=0, 5, 10, 15, 20$  and  $25$ ) hydrides. The considered H/M ratios for  $Zr_0$ ,  $Zr_5$ ,  $Zr_{10}$ ,  $Zr_{15}$ ,  $Zr_{20}$  and  $Zr_{25}$  are 2.2, 2.1, 2.075, 2.05, 2.025 and 2.175, respectively.

|           | $C_{11}$ | $C_{12}$ | $C_{13}$ | $C_{22}$ | $C_{23}$ | $C_{33}$ | $C_{44}$ | $C_{55}$ | $C_{66}$ |
|-----------|----------|----------|----------|----------|----------|----------|----------|----------|----------|
| $Zr_0$    | 282      | 115      | 123      | 277      | 138      | 235      | 102      | 79       | 113      |
| $Zr_5$    | 253      | 130      | 131      | 265      | 129      | 230      | 89       | 86       | 90       |
| $Zr_{10}$ | 245      | 131      | 130      | 244      | 134      | 220      | 73       | 78       | 79       |
| $Zr_{15}$ | 223      | 136      | 138      | 229      | 132      | 209      | 59       | 56       | 68       |
| $Zr_{20}$ | 224      | 133      | 132      | 236      | 124      | 210      | 60       | 69       | 69       |
| $Zr_{25}$ | 224      | 125      | 123      | 232      | 127      | 209      | 74       | 56       | 87       |

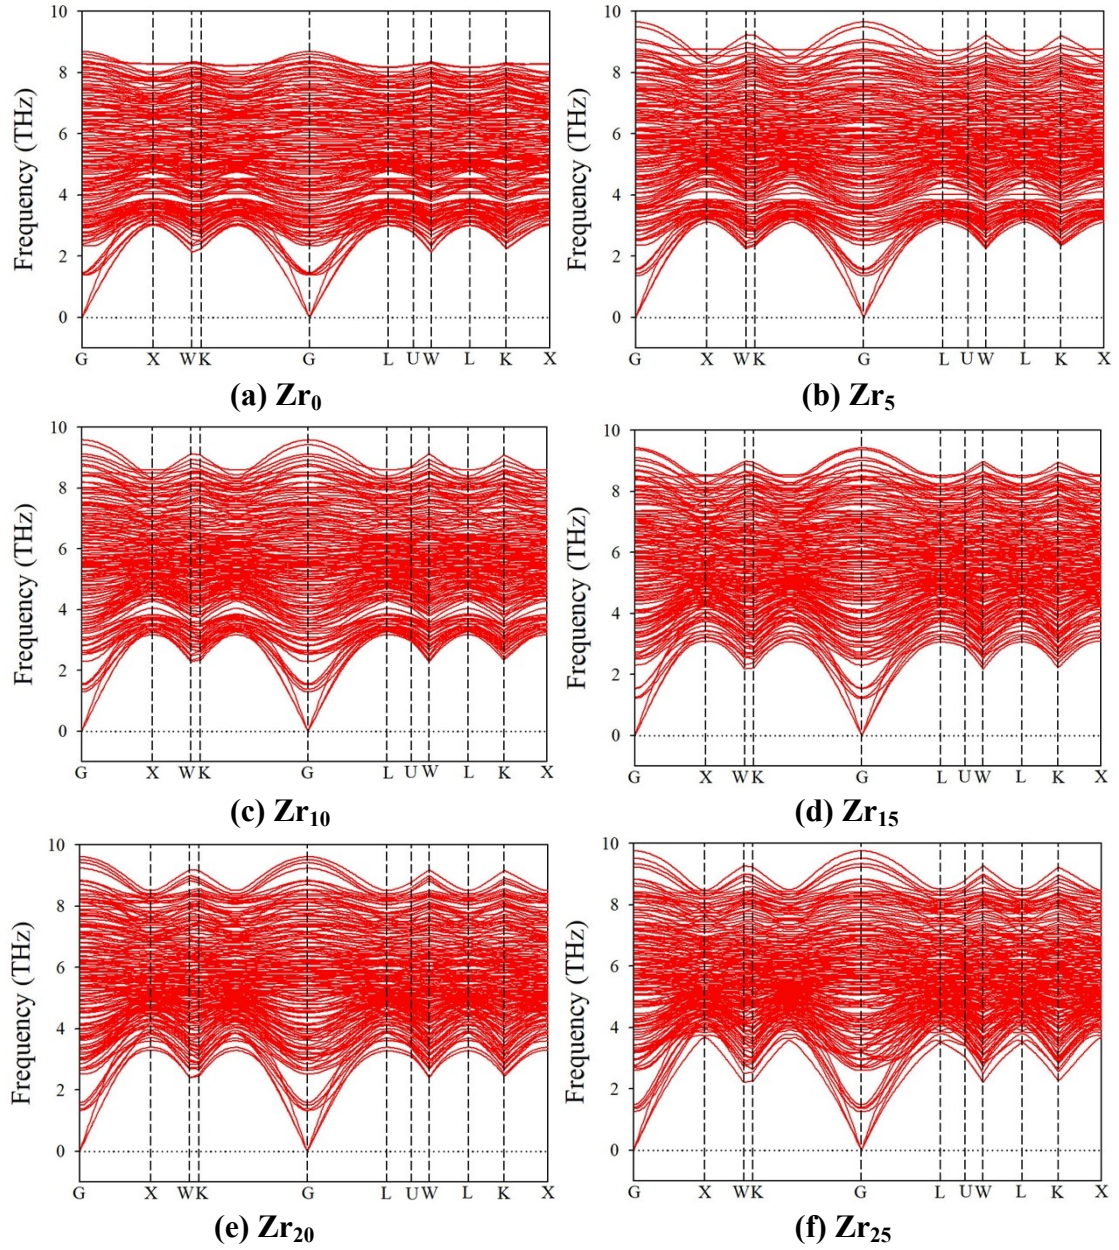

**Supplementary Figure S1.** Phonon spectra of (a)  $Ti_{25}V_{25}Nb_{25}Ta_{25}$  ( $Zr_0$ ), (b)  $Ti_{25}V_{25}Nb_{25}Zr_5Ta_{20}$  ( $Zr_5$ ), (c)  $Ti_{25}V_{25}Nb_{25}Zr_{10}Ta_{15}$  ( $Zr_{10}$ ), (d)  $Ti_{25}V_{25}Nb_{25}Zr_{15}Ta_{10}$  ( $Zr_{15}$ ), (e)  $Ti_{25}V_{25}Nb_{25}Zr_{20}Ta_5$  ( $Zr_{20}$ ) and (f)  $Ti_{25}V_{25}Nb_{25}Zr_{25}$  ( $Zr_{25}$ ) hydrides with  $H/M=2$ .

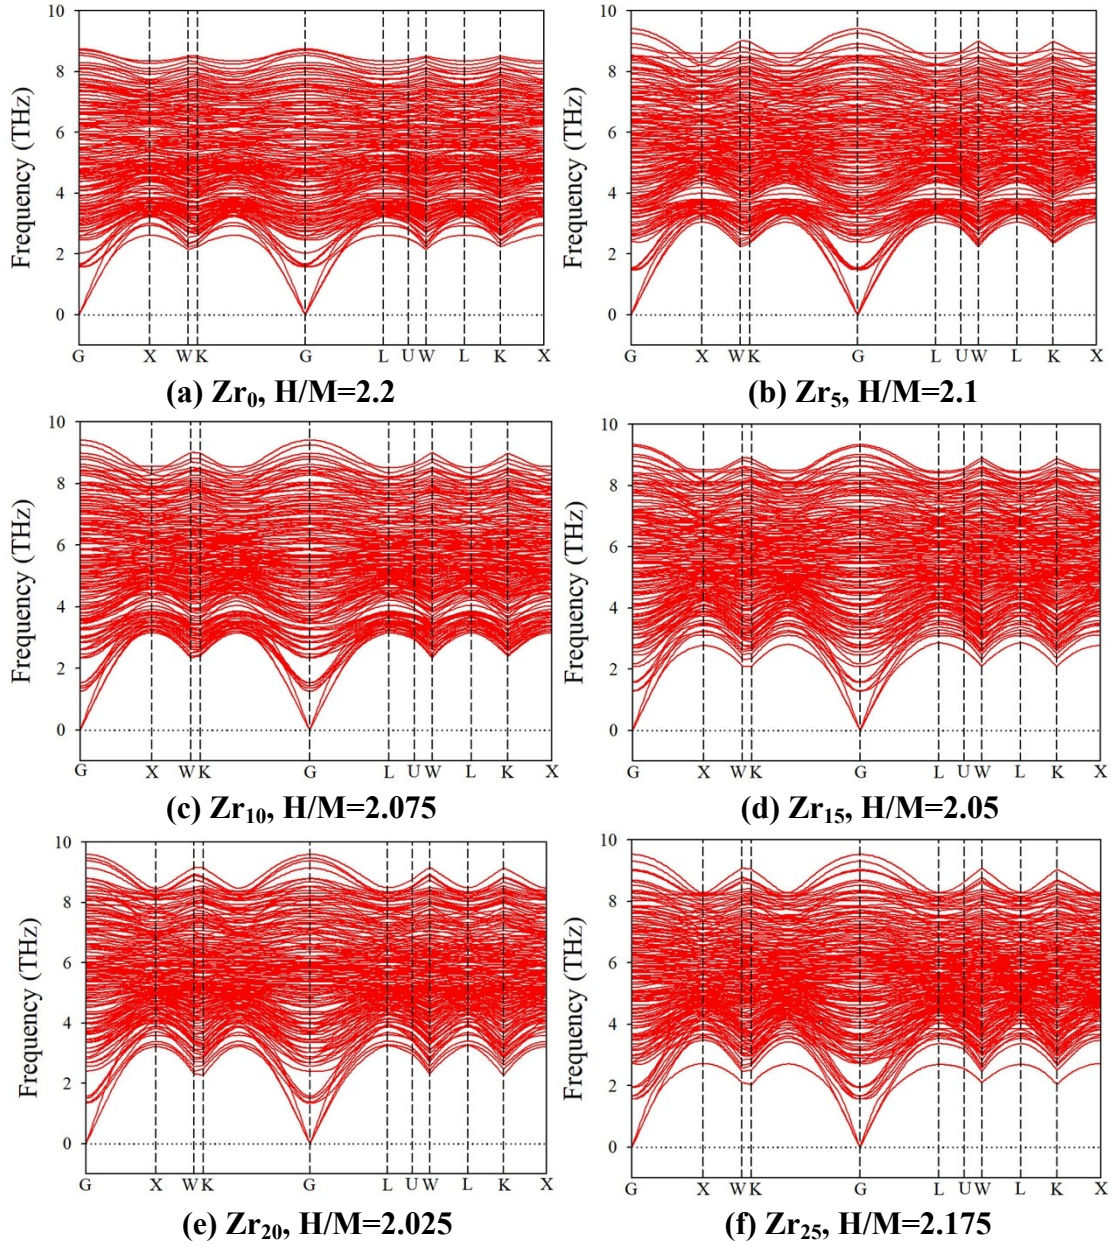

**Supplementary Figure S2.** Phonon spectra of (a)  $Ti_{25}V_{25}Nb_{25}Ta_{25}$  ( $Zr_0$ ) hydride with  $H/M=2.2$ ; (b)  $Ti_{25}V_{25}Nb_{25}Zr_5Ta_{20}$  ( $Zr_5$ ) hydride with  $H/M=2.1$ ; (c)  $Ti_{25}V_{25}Nb_{25}Zr_{10}Ta_{15}$  ( $Zr_{10}$ ) hydride with  $H/M=2.075$ ; (d)  $Ti_{25}V_{25}Nb_{25}Zr_{15}Ta_{10}$  ( $Zr_{15}$ ) hydride with  $H/M=2.05$ ; (e)  $Ti_{25}V_{25}Nb_{25}Zr_{20}Ta_5$  ( $Zr_{20}$ ) hydride with  $H/M=2.025$ ; (f)  $Ti_{25}V_{25}Nb_{25}Zr_{25}$  ( $Zr_{25}$ ) hydride with  $H/M=2.175$ .

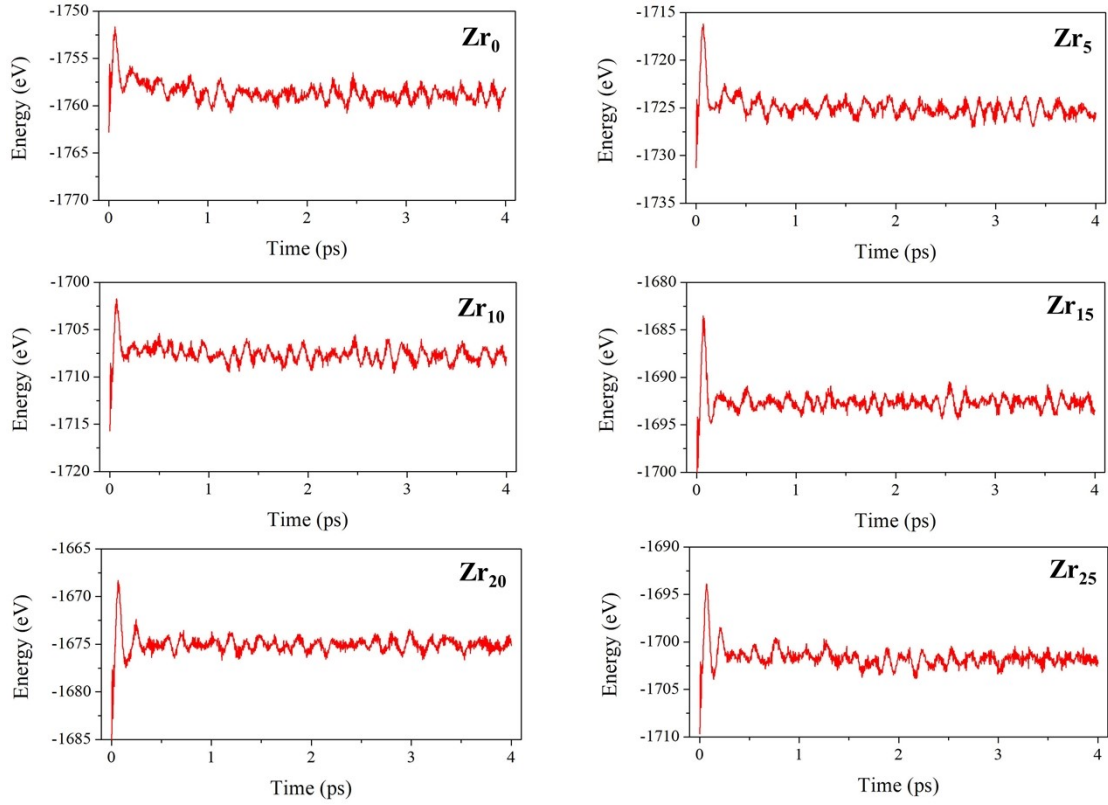

**Supplementary Figure S3.** Variation of the total energy with time for  $\text{Ti}_{25}\text{V}_{25}\text{Nb}_{25}\text{Zr}_x\text{Ta}_{25-x}$  ( $\text{Zr}_x$ ,  $x=0, 5, 10, 15, 20$  and  $25$ ) hydrides at 300 K. The considered H/M ratios for  $\text{Zr}_0$ ,  $\text{Zr}_5$ ,  $\text{Zr}_{10}$ ,  $\text{Zr}_{15}$ ,  $\text{Zr}_{20}$  and  $\text{Zr}_{25}$  are 2.2, 2.1, 2.075, 2.05, 2.025 and 2.175, respectively.

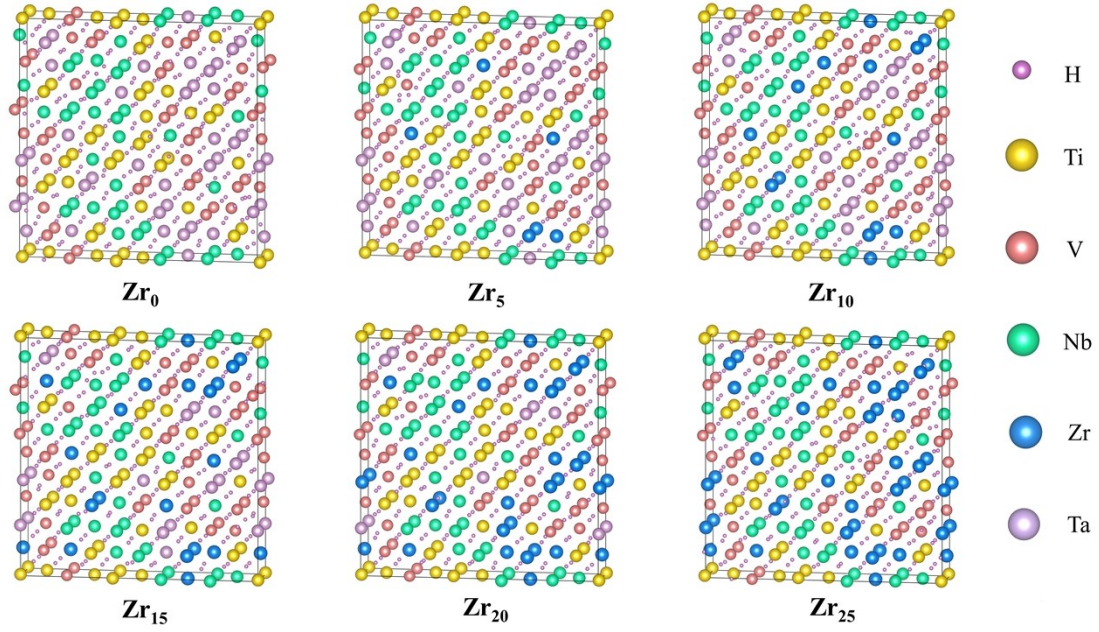

**Supplementary Figure S4.** Schematic view of the equilibrium structures for  $Ti_{25}V_{25}Nb_{25}Zr_xTa_{25-x}$  ( $Zr_x$ ,  $x=0, 5, 10, 15, 20$  and  $25$ ) hydrides obtained from *ab initio* MD simulation at 300 K. The considered H/M ratios for  $Zr_0$ ,  $Zr_5$ ,  $Zr_{10}$ ,  $Zr_{15}$ ,  $Zr_{20}$  and  $Zr_{25}$  are 2.2, 2.1, 2.075, 2.05, 2.025 and 2.175, respectively.

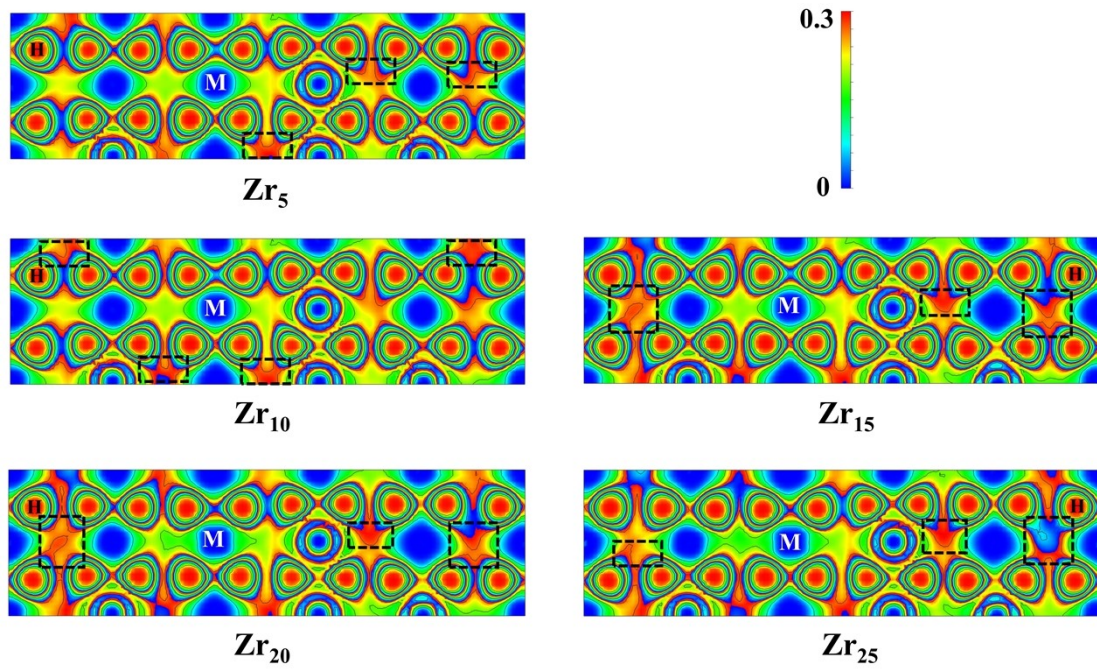

**Supplementary Figure S5.** Electron localization function (ELF) images of the (5 0 1) plane for  $\text{Ti}_{25}\text{V}_{25}\text{Nb}_{25}\text{Zr}_x\text{Ta}_{25-x}$  ( $\text{Zr}_x$ ;  $x = 5, 10, 15, 20$  and  $25$ ) hydrides with  $\text{H}/\text{M}=2$ . The symbols H and M represent hydrogen atoms and metal atoms, respectively. The polarizations of the electrons around the hydrogen in HEA hydrides are highlighted by the dashed rectangles.

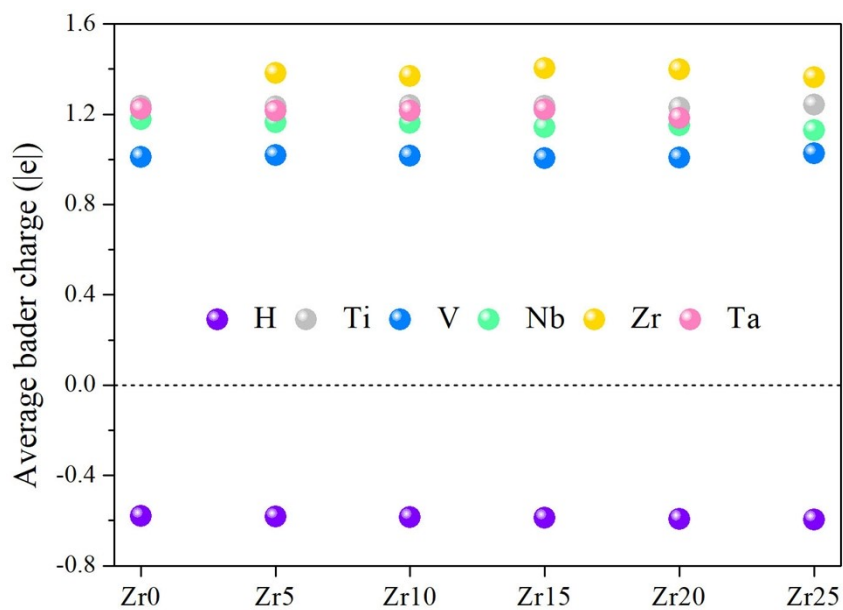

**Supplementary Figure S6.** The average Bader charge for different chemical elements in the  $\text{Ti}_{25}\text{V}_{25}\text{Nb}_{25}\text{Zr}_x\text{Ta}_{25-x}$  ( $\text{Zr}_x$ ,  $x=0, 5, 10, 15, 20$  and  $25$ ) hydrides with  $\text{H}/\text{M}=2$ .



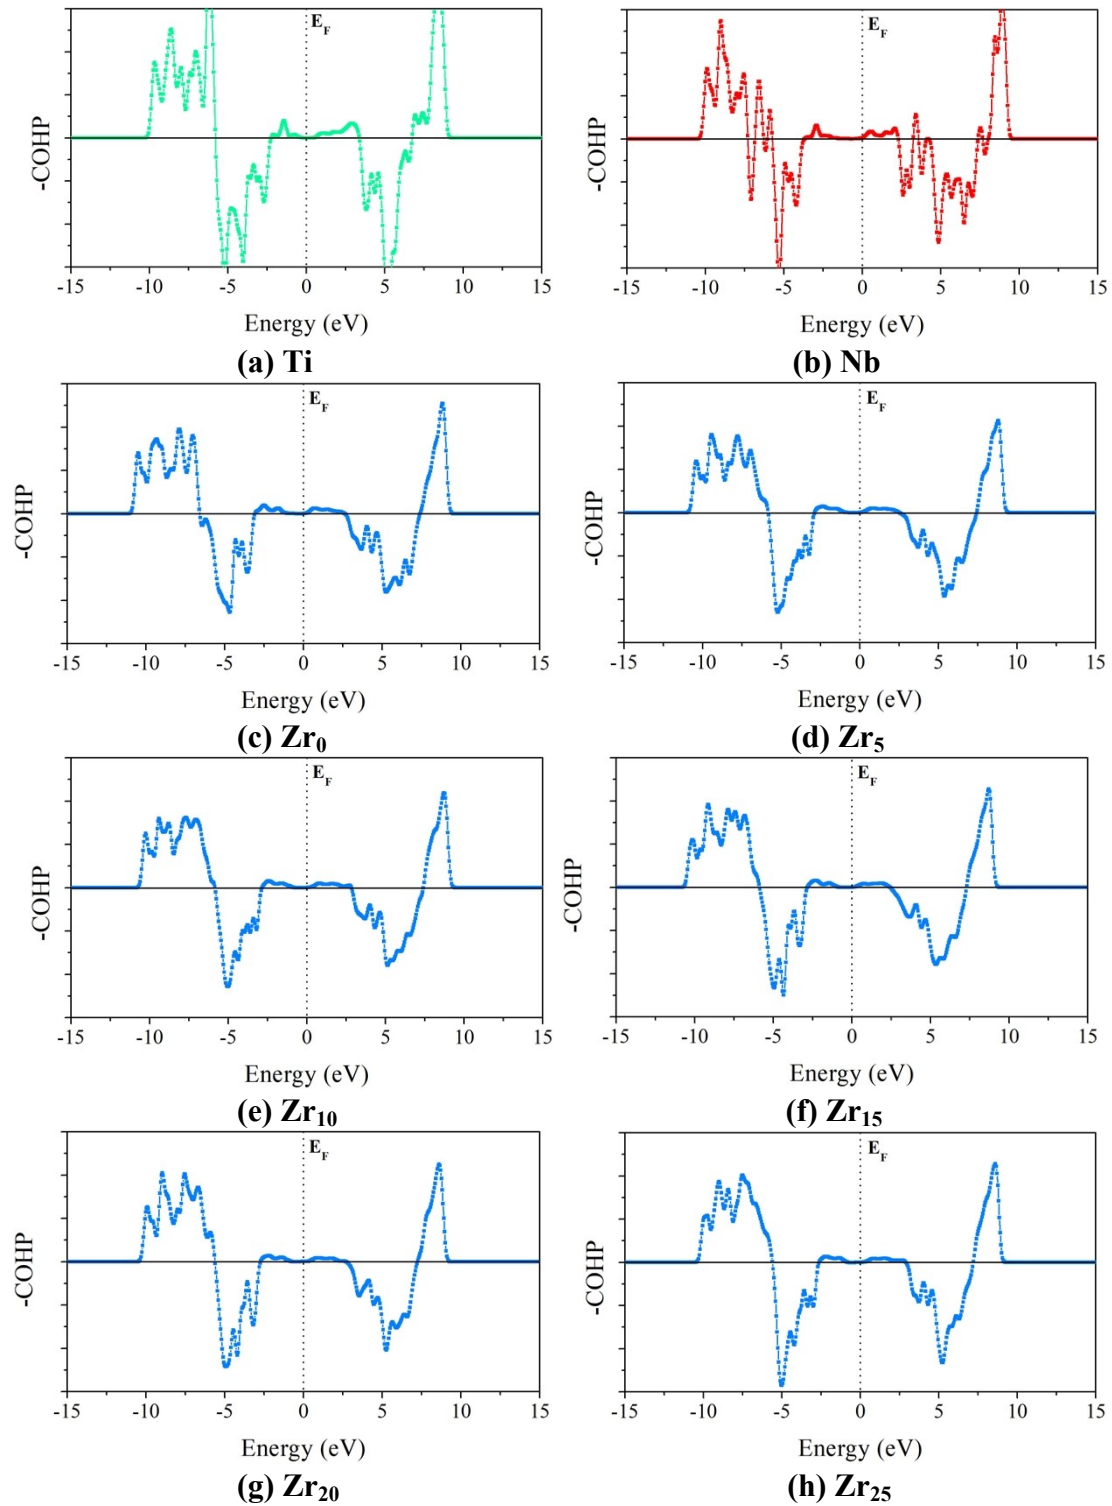

**Supplementary Figure S7.** The Crystal Orbital Hamilton Population (COHP) between hydrogen in pure Ti metal, pure Nb metal and  $\text{Ti}_{25}\text{V}_{25}\text{Nb}_{25}\text{Zr}_x\text{Ta}_{25-x}$  ( $\text{Zr}_x$ ;  $x=0, 5, 10, 15, 20$  and  $25$ ) hydrides with  $\text{H}/\text{M}=2$ . The Fermi level ( $E_F$ ) is located at  $0$  eV.

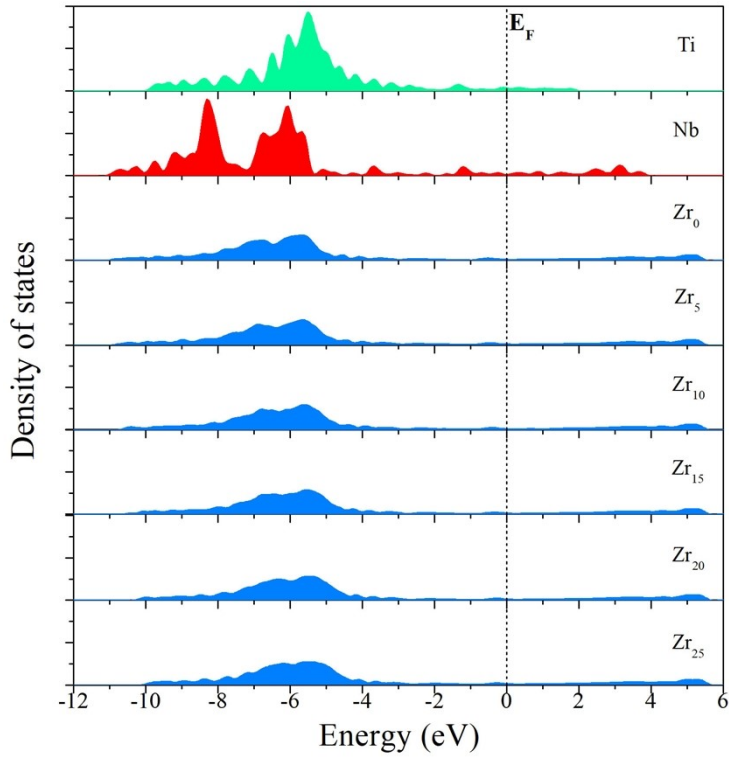

**Supplementary Figure S8.** The density of state (DOS) distribution of hydrogen in pure Ti metal, pure Nb metal and  $\text{Ti}_{25}\text{V}_{25}\text{Nb}_{25}\text{Zr}_x\text{Ta}_{25-x}$  ( $\text{Zr}_x$ ;  $x=0, 5, 10, 15, 20$  and  $25$ ) hydrides with  $H/M=2$ . The Fermi level ( $E_F$ ) is located at 0 eV.

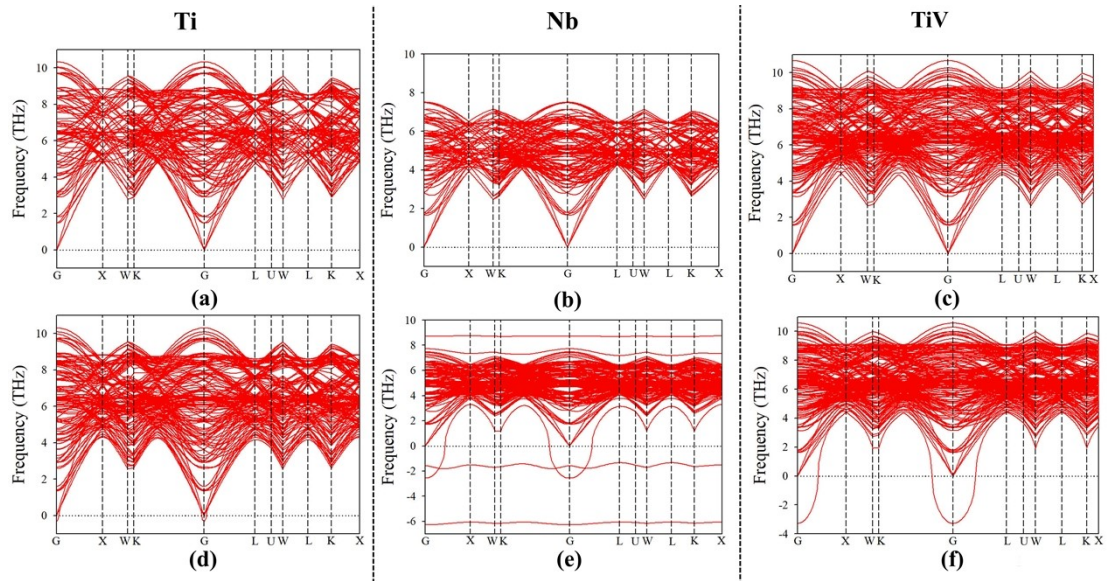

**Supplementary Figure S9.** The phonon spectra of Ti, Nb and TiV hydrides with (a-c) all tetrahedral sites occupied by hydrogen and (d-f) additional one octahedral site occupied by hydrogen.

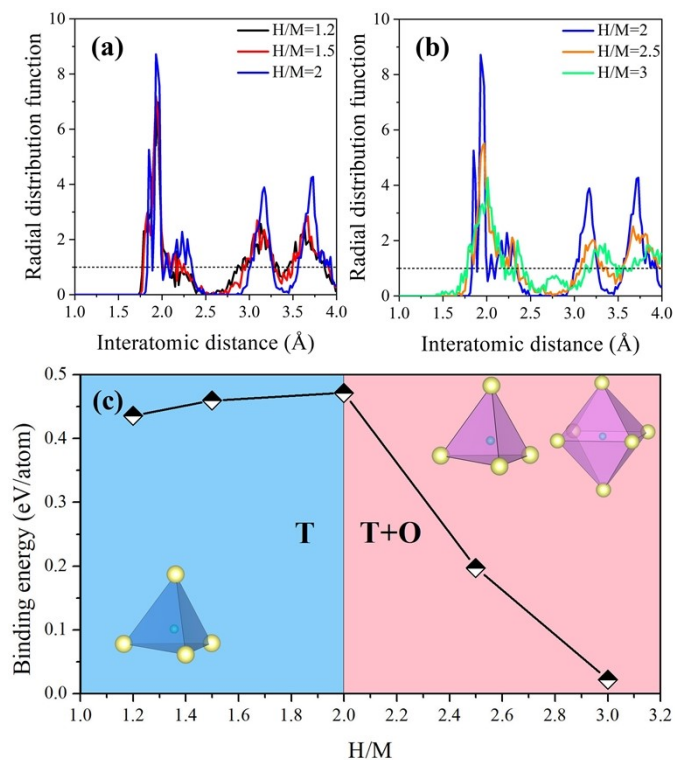

**Supplementary Figure S10.** Radial distribution functions between atoms for FCC  $\text{Ti}_{25}\text{V}_{25}\text{Nb}_{25}\text{Zr}_5\text{Ta}_{20}$  ( $\text{Zr}_5$ ) hydrides with (a)  $\text{H}/\text{M}=1.2, 1.5, 2$  and (b)  $\text{H}/\text{M}=2, 2.5, 3$ ; (c) The calculated binding energy as a function of hydrogen content for the FCC  $\text{Zr}_5$  hydrides. The symbols T and O represent hydrogen occupying tetrahedral and octahedral sites in FCC  $\text{Zr}_5$  hydrides, respectively.

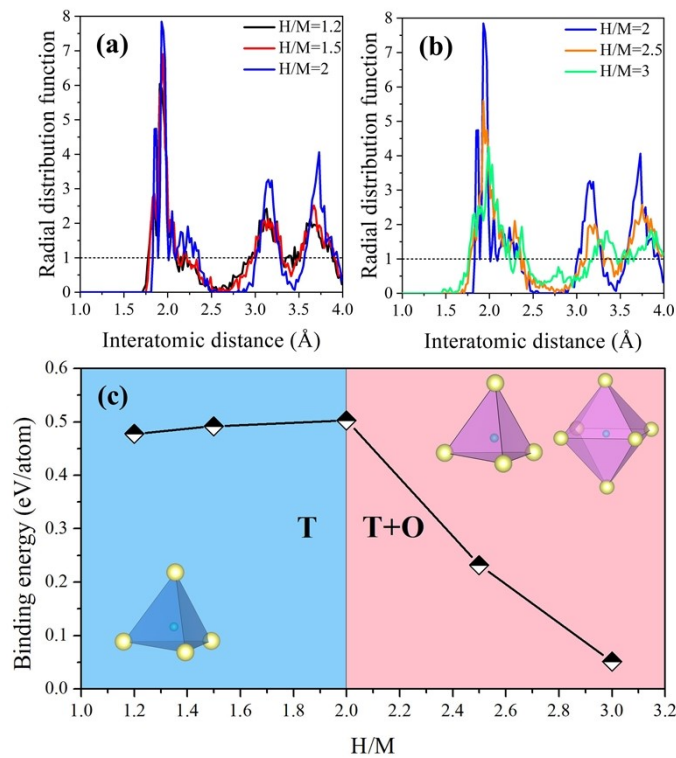

**Supplementary Figure S11.** Radial distribution functions between atoms for FCC  $\text{Ti}_{25}\text{V}_{25}\text{Nb}_{25}\text{Zr}_{10}\text{Ta}_{15}$  ( $\text{Zr}_{10}$ ) hydrides with (a)  $\text{H}/\text{M}=1.2, 1.5, 2$  and (b)  $\text{H}/\text{M}=2, 2.5, 3$ ; (c) The calculated binding energy as a function of hydrogen content for the FCC  $\text{Zr}_{10}$  hydrides. The symbols T and O represent hydrogen occupying tetrahedral and octahedral sites in FCC  $\text{Zr}_{10}$  hydrides, respectively.

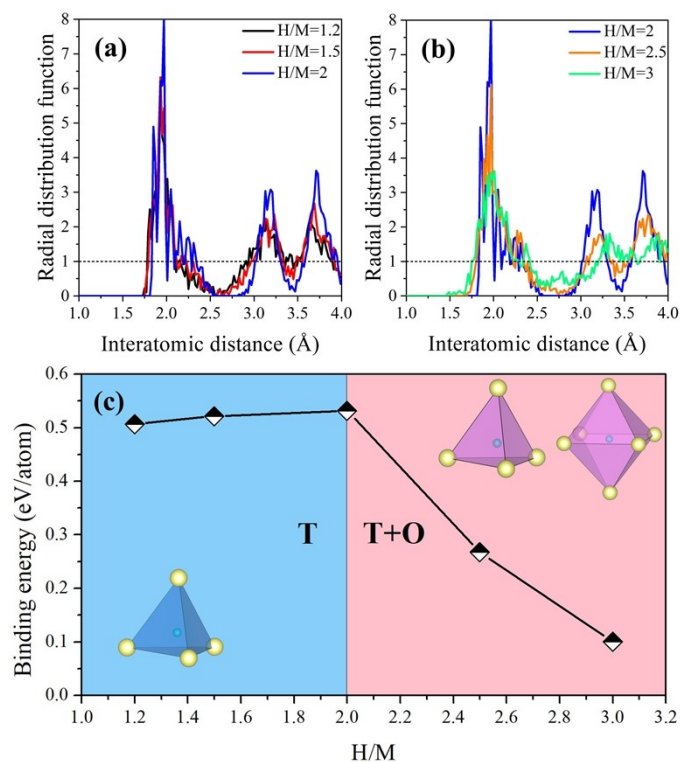

**Supplementary Figure S12.** Radial distribution functions between atoms for FCC  $\text{Ti}_{25}\text{V}_{25}\text{Nb}_{25}\text{Zr}_{15}\text{Ta}_{10}$  ( $\text{Zr}_{15}$ ) hydrides with (a)  $\text{H}/\text{M}=1.2, 1.5, 2$  and (b)  $\text{H}/\text{M}=2, 2.5, 3$ ; (c) The calculated binding energy as a function of hydrogen content for the FCC  $\text{Zr}_{15}$  hydrides. The symbols T and O represent hydrogen occupying tetrahedral and octahedral sites in FCC  $\text{Zr}_{15}$  hydrides, respectively.

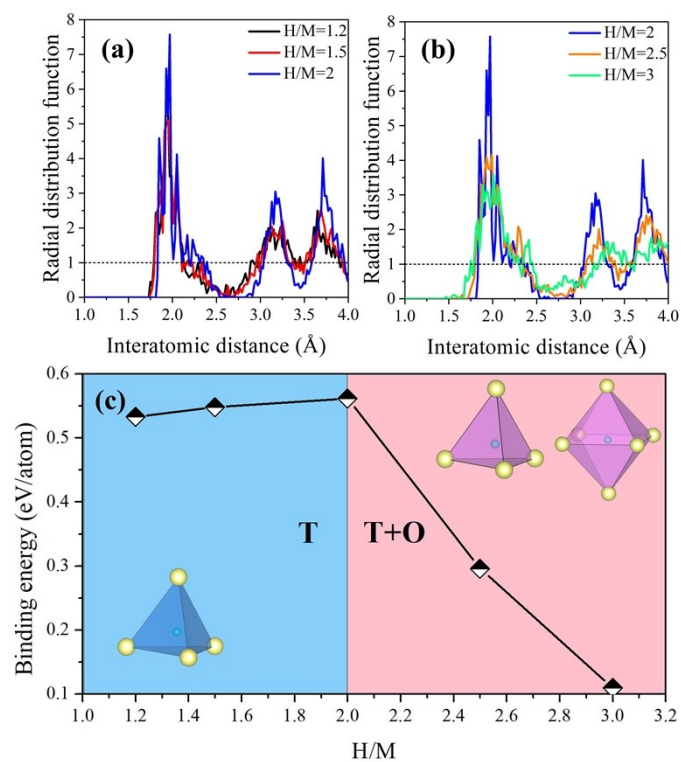

**Supplementary Figure S13.** Radial distribution functions between atoms for FCC  $\text{Ti}_{25}\text{V}_{25}\text{Nb}_{25}\text{Zr}_{20}\text{Ta}_5$  ( $\text{Zr}_{20}$ ) hydrides with (a)  $\text{H}/\text{M}=1.2, 1.5, 2$  and (b)  $\text{H}/\text{M}=2, 2.5, 3$ ; (c) The calculated binding energy as a function of hydrogen content for the FCC  $\text{Zr}_{20}$  hydrides. The symbols T and O represent hydrogen occupying tetrahedral and octahedral sites in FCC  $\text{Zr}_{20}$  hydrides, respectively.

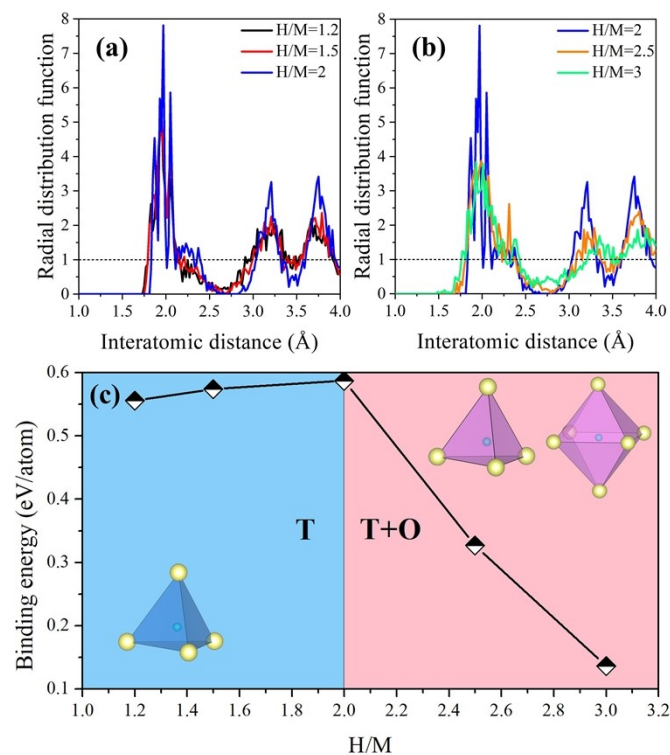

**Supplementary Figure S14.** Radial distribution functions between atoms for FCC  $\text{Ti}_{25}\text{V}_{25}\text{Nb}_{25}\text{Zr}_{25}$  ( $\text{Zr}_{25}$ ) hydrides with (a)  $\text{H}/\text{M}=1.2, 1.5, 2$  and (b)  $\text{H}/\text{M}=2, 2.5, 3$ ; (c) The calculated binding energy as a function of hydrogen content for the FCC  $\text{Zr}_{25}$  hydrides. The symbols T and O represent hydrogen occupying tetrahedral and octahedral sites in FCC  $\text{Zr}_{25}$  hydrides, respectively.
